# Supplementary material for: MFG-E8 protein promotes C2C12myogenic differentiation by enhancing PI3K/Akt signaling
Source: Royal Society of Chemistry journal article supplement (doi:10.1039/c7nj02216f), 2017-01-01
Supplement: c7nj02216f1.pdf [file c7nj02216f1.pdf]

**Table 1.** The number of MyHC-positive cells containing more than five nuclei was counted.

**Multiple Comparisons**

Dependent Variable:VAR00002

|                                  | (I) | (J) | Mean Difference<br>(I-J) | Std. Error | Sig. | 95% Confidence Interval |              |
|----------------------------------|-----|-----|--------------------------|------------|------|-------------------------|--------------|
|                                  |     |     |                          |            |      | VAR00<br>001            | VAR00<br>001 |
| Tukey HSD                        | 1   | 2   | -1.16000*                | .29059     | .017 | -2.0516                 | -.2684       |
|                                  |     | 3   | -3.81000*                | .29059     | .000 | -4.7016                 | -2.9184      |
|                                  | 2   | 1   | 1.16000*                 | .29059     | .017 | .2684                   | 2.0516       |
|                                  |     | 3   | -2.65000*                | .29059     | .000 | -3.5416                 | -1.7584      |
|                                  | 3   | 1   | 3.81000*                 | .29059     | .000 | 2.9184                  | 4.7016       |
|                                  |     | 2   | 2.65000*                 | .29059     | .000 | 1.7584                  | 3.5416       |
| LSD                              | 1   | 2   | -1.16000*                | .29059     | .007 | -1.8711                 | -.4489       |
|                                  |     | 3   | -3.81000*                | .29059     | .000 | -4.5211                 | -3.0989      |
|                                  | 2   | 1   | 1.16000*                 | .29059     | .007 | .4489                   | 1.8711       |
|                                  |     | 3   | -2.65000*                | .29059     | .000 | -3.3611                 | -1.9389      |
|                                  | 3   | 1   | 3.81000*                 | .29059     | .000 | 3.0989                  | 4.5211       |
|                                  |     | 2   | 2.65000*                 | .29059     | .000 | 1.9389                  | 3.3611       |
| Dunnett t (2-sided) <sup>a</sup> | 1   | 3   | -3.81000*                | .29059     | .000 | -4.6419                 | -2.9781      |
|                                  | 2   | 3   | -2.65000*                | .29059     | .000 | -3.4819                 | -1.8181      |

\*. The mean difference is significant at the 0.05 level.

a. Dunnett t-tests treat one group as a control, and compare all other groups against it.

**Table 2.** The effects of MFG-E8 on mRNA levels of MyoG (B) at day 5 during C<sub>2</sub>C<sub>12</sub> cell differentiation.

**Multiple Comparisons**

Dependent Variable:VAR00002

|           | (I) | (J) | Mean Difference<br>(I-J) | Std. Error | Sig. | 95% Confidence Interval |              |
|-----------|-----|-----|--------------------------|------------|------|-------------------------|--------------|
|           |     |     |                          |            |      | VAR00<br>001            | VAR00<br>001 |
| Tukey HSD | 1   | 2   | -.09000*                 | .00667     | .000 | -.1105                  | -.0695       |
|           |     | 3   | -.78000*                 | .00667     | .000 | -.8005                  | -.7595       |
|           | 2   | 1   | .09000*                  | .00667     | .000 | .0695                   | .1105        |
|           |     | 3   | -.69000*                 | .00667     | .000 | -.7105                  | -.6695       |
|           | 3   | 1   | .78000*                  | .00667     | .000 | .7595                   | .8005        |
|           |     | 2   | .69000*                  | .00667     | .000 | .6695                   | .7105        |
| LSD       | 1   | 2   | -.09000*                 | .00667     | .000 | -.1063                  | -.0737       |
|           |     | 3   | -.78000*                 | .00667     | .000 | -.7963                  | -.7637       |

|                                  |   |   |          |        |      |        |        |
|----------------------------------|---|---|----------|--------|------|--------|--------|
|                                  | 2 | 1 | .09000*  | .00667 | .000 | .0737  | .1063  |
|                                  |   | 3 | -.69000* | .00667 | .000 | -.7063 | -.6737 |
|                                  | 3 | 1 | .78000*  | .00667 | .000 | .7637  | .7963  |
|                                  |   | 2 | .69000*  | .00667 | .000 | .6737  | .7063  |
| Dunnett t (2-sided) <sup>a</sup> | 1 | 3 | -.78000* | .00667 | .000 | -.7991 | -.7609 |
|                                  | 2 | 3 | -.69000* | .00667 | .000 | -.7091 | -.6709 |

\*. The mean difference is significant at the 0.05 level.

a. Dunnett t-tests treat one group as a control, and compare all other groups against it.

**Table 3.** The effects of MFG-E8 on mRNA levels of MyHC (C) at day 7 during C<sub>2</sub>C<sub>12</sub> cell differentiation.

### Multiple Comparisons

Dependent Variable:VAR00002

|                                  | (I)          | (J)          | Mean Difference<br>(I-J) | Std. Error | Sig.  | 95% Confidence Interval |             |
|----------------------------------|--------------|--------------|--------------------------|------------|-------|-------------------------|-------------|
|                                  |              |              |                          |            |       | Lower Bound             | Upper Bound |
| Tukey HSD                        | VAR00<br>001 | VAR00<br>001 |                          |            |       |                         |             |
|                                  |              | 2            | -.13333*                 | .00720     | .000  | -.1554                  | -.1112      |
|                                  |              | 3            | -.87000*                 | .00720     | .000  | -.8921                  | -.8479      |
|                                  | 2            | 1            | .13333*                  | .00720     | .000  | .1112                   | .1554       |
|                                  |              | 3            | -.73667*                 | .00720     | .000  | -.7588                  | -.7146      |
|                                  | 3            | 1            | .87000*                  | .00720     | .000  | .8479                   | .8921       |
| 2                                |              | .73667*      | .00720                   | .000       | .7146 | .7588                   |             |
| LSD                              | 1            | 2            | -.13333*                 | .00720     | .000  | -.1510                  | -.1157      |
|                                  |              | 3            | -.87000*                 | .00720     | .000  | -.8876                  | -.8524      |
|                                  | 2            | 1            | .13333*                  | .00720     | .000  | .1157                   | .1510       |
|                                  |              | 3            | -.73667*                 | .00720     | .000  | -.7543                  | -.7190      |
|                                  | 3            | 1            | .87000*                  | .00720     | .000  | .8524                   | .8876       |
|                                  |              | 2            | .73667*                  | .00720     | .000  | .7190                   | .7543       |
| Dunnett t (2-sided) <sup>a</sup> | 1            | 3            | -.87000*                 | .00720     | .000  | -.8906                  | -.8494      |
|                                  | 2            | 3            | -.73667*                 | .00720     | .000  | -.7573                  | -.7161      |

\*. The mean difference is significant at the 0.05 level.

a. Dunnett t-tests treat one group as a control, and compare all other groups against it.

**Table 4.** Inhibitory effects of MFG-E8 on MyoD (A) expression. C<sub>2</sub>C<sub>12</sub> cells were cultured in differentiation medium in the absence or presence of MFG-E8 for 5 day.

**Multiple Comparisons**

Dependent Variable:VAR00002

|           | (I)          | (J)          | Mean Difference<br>(I-J) | Std. Error | Sig.   | 95% Confidence Interval |             |
|-----------|--------------|--------------|--------------------------|------------|--------|-------------------------|-------------|
|           | VAR00<br>001 | VAR00<br>001 |                          |            |        | Lower Bound             | Upper Bound |
| Tukey HSD | 1            | 2            | -.46667*                 | .02277     | .000   | -.5432                  | -.3902      |
|           |              | 3            | .01333                   | .02277     | .990   | -.0632                  | .0898       |
|           |              | 4            | .18333*                  | .02277     | .000   | .1068                   | .2598       |
|           |              | 5            | -.18333*                 | .02277     | .000   | -.2598                  | -.1068      |
|           |              | 6            | -.29333*                 | .02277     | .000   | -.3698                  | -.2168      |
|           | 2            | 1            | .46667*                  | .02277     | .000   | .3902                   | .5432       |
|           |              | 3            | .48000*                  | .02277     | .000   | .4035                   | .5565       |
|           |              | 4            | .65000*                  | .02277     | .000   | .5735                   | .7265       |
|           |              | 5            | .28333*                  | .02277     | .000   | .2068                   | .3598       |
|           |              | 6            | .17333*                  | .02277     | .000   | .0968                   | .2498       |
|           | 3            | 1            | -.01333                  | .02277     | .990   | -.0898                  | .0632       |
|           |              | 2            | -.48000*                 | .02277     | .000   | -.5565                  | -.4035      |
|           |              | 4            | .17000*                  | .02277     | .000   | .0935                   | .2465       |
|           |              | 5            | -.19667*                 | .02277     | .000   | -.2732                  | -.1202      |
|           |              | 6            | -.30667*                 | .02277     | .000   | -.3832                  | -.2302      |
|           | 4            | 1            | -.18333*                 | .02277     | .000   | -.2598                  | -.1068      |
|           |              | 2            | -.65000*                 | .02277     | .000   | -.7265                  | -.5735      |
|           |              | 3            | -.17000*                 | .02277     | .000   | -.2465                  | -.0935      |
| 5         |              | -.36667*     | .02277                   | .000       | -.4432 | -.2902                  |             |
| 6         |              | -.47667*     | .02277                   | .000       | -.5532 | -.4002                  |             |
| 5         | 1            | .18333*      | .02277                   | .000       | .1068  | .2598                   |             |
|           | 2            | -.28333*     | .02277                   | .000       | -.3598 | -.2068                  |             |
|           | 3            | .19667*      | .02277                   | .000       | .1202  | .2732                   |             |
|           | 4            | .36667*      | .02277                   | .000       | .2902  | .4432                   |             |
|           | 6            | -.11000*     | .02277                   | .004       | -.1865 | -.0335                  |             |
| 6         | 1            | .29333*      | .02277                   | .000       | .2168  | .3698                   |             |
|           | 2            | -.17333*     | .02277                   | .000       | -.2498 | -.0968                  |             |
|           | 3            | .30667*      | .02277                   | .000       | .2302  | .3832                   |             |
|           | 4            | .47667*      | .02277                   | .000       | .4002  | .5532                   |             |
|           | 5            | .11000*      | .02277                   | .004       | .0335  | .1865                   |             |
| LSD       | 1            | 2            | -.46667*                 | .02277     | .000   | -.5163                  | -.4171      |
|           |              | 3            | .01333                   | .02277     | .569   | -.0363                  | .0629       |

|                                  |   |   |          |        |      |        |        |
|----------------------------------|---|---|----------|--------|------|--------|--------|
|                                  | 4 |   | .18333*  | .02277 | .000 | .1337  | .2329  |
|                                  | 5 |   | -.18333* | .02277 | .000 | -.2329 | -.1337 |
|                                  | 6 |   | -.29333* | .02277 | .000 | -.3429 | -.2437 |
| 2                                | 1 |   | .46667*  | .02277 | .000 | .4171  | .5163  |
|                                  | 3 |   | .48000*  | .02277 | .000 | .4304  | .5296  |
|                                  | 4 |   | .65000*  | .02277 | .000 | .6004  | .6996  |
|                                  | 5 |   | .28333*  | .02277 | .000 | .2337  | .3329  |
|                                  | 6 |   | .17333*  | .02277 | .000 | .1237  | .2229  |
| 3                                | 1 |   | -.01333  | .02277 | .569 | -.0629 | .0363  |
|                                  | 2 |   | -.48000* | .02277 | .000 | -.5296 | -.4304 |
|                                  | 4 |   | .17000*  | .02277 | .000 | .1204  | .2196  |
|                                  | 5 |   | -.19667* | .02277 | .000 | -.2463 | -.1471 |
|                                  | 6 |   | -.30667* | .02277 | .000 | -.3563 | -.2571 |
| 4                                | 1 |   | -.18333* | .02277 | .000 | -.2329 | -.1337 |
|                                  | 2 |   | -.65000* | .02277 | .000 | -.6996 | -.6004 |
|                                  | 3 |   | -.17000* | .02277 | .000 | -.2196 | -.1204 |
|                                  | 5 |   | -.36667* | .02277 | .000 | -.4163 | -.3171 |
|                                  | 6 |   | -.47667* | .02277 | .000 | -.5263 | -.4271 |
| 5                                | 1 |   | .18333*  | .02277 | .000 | .1337  | .2329  |
|                                  | 2 |   | -.28333* | .02277 | .000 | -.3329 | -.2337 |
|                                  | 3 |   | .19667*  | .02277 | .000 | .1471  | .2463  |
|                                  | 4 |   | .36667*  | .02277 | .000 | .3171  | .4163  |
|                                  | 6 |   | -.11000* | .02277 | .000 | -.1596 | -.0604 |
| 6                                | 1 |   | .29333*  | .02277 | .000 | .2437  | .3429  |
|                                  | 2 |   | -.17333* | .02277 | .000 | -.2229 | -.1237 |
|                                  | 3 |   | .30667*  | .02277 | .000 | .2571  | .3563  |
|                                  | 4 |   | .47667*  | .02277 | .000 | .4271  | .5263  |
|                                  | 5 |   | .11000*  | .02277 | .000 | .0604  | .1596  |
| Dunnett t (2-sided) <sup>a</sup> | 1 | 6 | -.29333* | .02277 | .000 | -.3594 | -.2273 |
|                                  | 2 | 6 | .17333*  | .02277 | .000 | .1073  | .2394  |
|                                  | 3 | 6 | -.30667* | .02277 | .000 | -.3727 | -.2406 |
|                                  | 4 | 6 | -.47667* | .02277 | .000 | -.5427 | -.4106 |
|                                  | 5 | 6 | -.11000* | .02277 | .002 | -.1761 | -.0439 |

\*. The mean difference is significant at the 0.05 level.

a. Dunnett t-tests treat one group as a control, and compare all other groups against it.
